# Supplementary material
Source: PubMed Central journal article supplement (PMC2875801)
Supplement: me.2009-0437_1.pdf [file me.2009-0437_1.pdf]

## Supplemental Data

Table 1. Primers for gene expression

| Gene name      | Forward Primer         | Reverse Primer        |
|----------------|------------------------|-----------------------|
| $\beta$ -actin | AACACCCCAGCCATGTACGTAG | GAACCGCTCATTGCCGATAGT |
| ACC            | TACAACGCAGGCATCAGAAG   | TGTGCTGCAGGAAGATTGAC  |
| Hbegf          | GACCGATCTGGACCTTTTCA   | CCGTGGATGCAGTAGTCCTT  |
| Prok2          | CCCGCTACTGCTACTTTTGC   | ATGGAACTTTCCGAGTCAGG  |
| Glut2          | GTGACTGGGACACTGGTCCT   | GGAGAGAGCCCAAAGGGTAG  |
| GPDH           | ATCAACACGCAACACGAGAA   | CCCTTGAGCTGGTCACAGAT  |
| Slc2a4         | AGCAGATCGGCTCTGAAGAT   | CTACCAGCCAAGTTGCATT   |
| Cyclin A2      | GAATGAGACCCTGCATTTGG   | GGTGCTCCATTCTCAGAACC  |
| Cyclin E1      | GACAGCTAGCGCGGTGTAG    | GTTGCTGTGGTCCTTCGAGT  |

Table 2. Primers for ChIP assays

| Gene name                | Forward Primer         | Reverse primer        |
|--------------------------|------------------------|-----------------------|
| $\beta$ -actin           | AACACCCCAGCCATGTACGTAG | GAACCGCTCATTGCCGATAGT |
| Pklr coding              | GTGGAGCACGGTGGTATCTT   | CTTCACGCCTTCATGGTTCT  |
| Pklr +1200               | TGAACTGAGGACCAGACAGAC  | GTGTGTGTGTGTGTGCAAGA  |
| Pklr +500                | GTGCAAGAGCCTGAGTTTCC   | CGATATCCAGAAGGCAGAGG  |
| Pklr -500                | CTAGGGGAAGGGGAGAGATG   | TGGACAGACATGCTTCCAAA  |
| Pklr -1100               | ATCTGCCTGACTCCCCTGT    | ACCACCTGGCACTTACTGCT  |
| Pklr TSS                 | GGCGCAGTATAAAGCAGACC   | CAATTCTCTGGCCTTCTCCA  |
| Pklr ChoRE               | CAGACCTGATCTGAGCCTTTG  | CGTTGCTTACCTGCTGTGTC  |
| $\alpha$ -actin promoter | CAGACCTGATCTGAGCCTTTG  | CGTTGCTTACCTGCTGTGTC  |
| Gpdh ChoRE               | AGCCTGGAGGATGACAACAC   | GTTTGAGCACCATGGCATC   |
| Slc2a4 ChoRE             | CTCTCCCTGGACGTGCTTAG   | CATCCCCTCCACACATTTCT  |
| Prok2 ChoRE              | CTGGCGGCGGTTATAAAG     | GGAGGGTTTCTGAGACCACA  |

Table 3. Primers for nuclear run-on

| Gene name      | Forward Primer       | Reverse Primer       |
|----------------|----------------------|----------------------|
| $\beta$ -actin | TAGCCCTCTTTTGTGCCTTG | TGCCACTCCCAAAGTAAAGG |
| Pklr           | GAACACCTCTGCCTTCTGGA | CCCTGCACAAATCTCACAAA |

Supplemental Figure 1

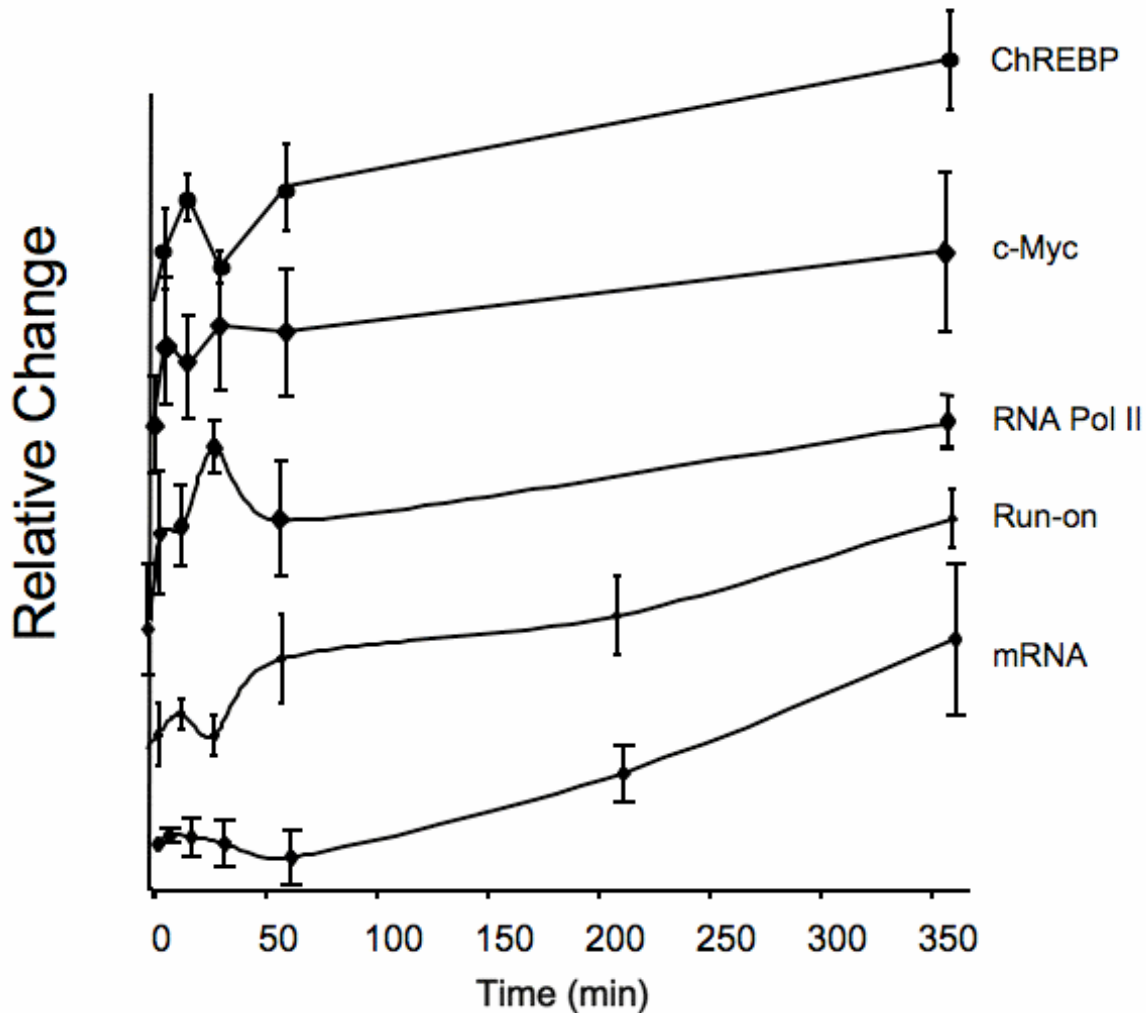

Supplemental Figure 1. **Molecular time course of Pklr gene expression.**

This figure compares how glucose affects ChREBP binding, the rate of transcription of Pklr, and the accumulation of Pklr mRNA. Of the factors tested, the biphasic binding of ChREBP after exposure to high glucose concentrations most closely correlates with the biphasic transcriptional activity. However, the accumulation of mRNA lags behind ChREBP binding and transcriptional rate, suggesting the first phase represents an unproductive “priming” initiation cycle – a process that may be common for newly activated genes (44).

Supplemental Figure 2

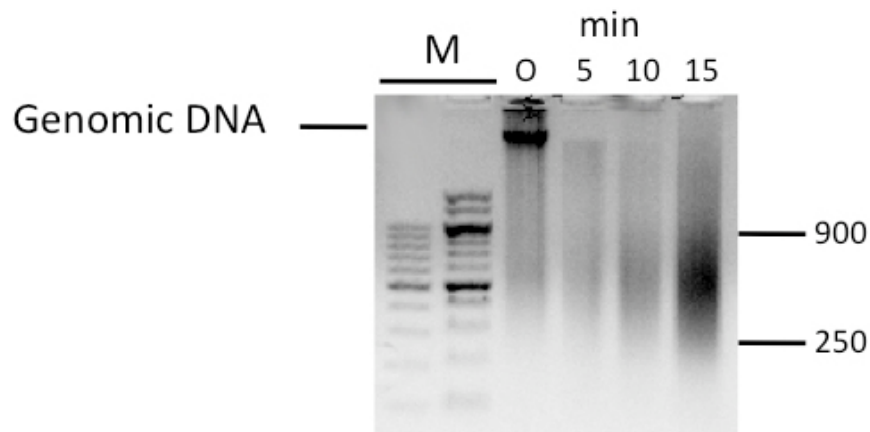

Supplemental Figure 2. **Sonication of genomic DNA for ChIP assay.**

This figure shows the extent of fragmentation of genomic DNA with increasing duration of sonication. Pictured is a reverse image of a 1% agarose gel, loaded with equal amounts of genomic DNA (1  $\mu$ g) stained with ethidium bromide. Fifteen min of sonication with the Diagenode Bioruptor resulted in chromatin fragments ranging from 250 to 900 bp in size. Shown is representative of several independent experiments. M, 100 bp size markers.
